# Supplementary material for: Syntheses, crystal structures, photoluminescent/magnetic properties of four new coordination polymers based on 2,3′,4,5′-biphenyltetracarboxylic acid
Source: Royal Society of Chemistry journal article supplement (doi:10.1039/c4ra09505g), 2014-01-01
Supplement: c4ra09505g1.pdf [file c4ra09505g1.pdf]

## Electronic Supplementary Information (ESI) for RSC Advances

### Syntheses, crystal structures, photoluminescent/magnetic properties of four new coordination polymers based on 2,3', 4,5'-biphenyltetracarboxylic acid

Jin-Zhong Qiao,<sup>a</sup> Mao-Sheng Zhan,<sup>a</sup> Tuo-Ping Hu,<sup>\*b</sup>

<sup>a</sup> Key Laboratory of Aerospace Materials and Performance (Ministry of Education), School of Materials Science and Engineering, Beihang University, No.37, Xueyuan Road, Beijing 100191, China. E-mail: qiaojinzhong@nuc.edu.cn.

<sup>b</sup> Department of Chemistry, North University of China, Taiyuan 030051, China. E-mail: Hutuopingsx@126.com.

### Content

|                                                                                                                                                         |   |
|---------------------------------------------------------------------------------------------------------------------------------------------------------|---|
| (1) Table S1: selected bond lengths (Å) and angles (°) for 1-4. ....                                                                                    | 2 |
| (2) Fig. S1: the metal coordination environment of complex 1.....                                                                                       | 4 |
| (3) Fig. S2: View of the 3D framework of compound 1 along the [111] direction with one-dimensional channels and hydrogen atoms omitted for clarity..... | 4 |
| (4) Fig. S3: the metal coordination environment of complex 2.....                                                                                       | 5 |
| (5) Table S2: the hydrogen bond geometry for complex 2 .....                                                                                            | 5 |
| (6) Fig. S4: Schematic view of one of the two interpenetrated nets for complex 2 .....                                                                  | 5 |
| (7) Table S3: the hydrogen bond geometry for complex 3 .....                                                                                            | 5 |
| (8) Fig. S5: the 3D supermolecular structure of complex 3.....                                                                                          | 6 |
| (9) Fig. S6: the metal coordination environment of complex 4 .....                                                                                      | 6 |
| (10) Fig. S7: Schematic view of one of the two interpenetrated nets for complex 4.....                                                                  | 6 |
| (11) Fig. S8: the excitation spectra of complexes 3, 4 and the H <sub>4</sub> bptc ligand.....                                                          | 7 |

## Electronic Supplementary Information (ESI) for RSC Advances

Table S1 Selected bond lengths (Å) and angles (°) for 1-4.

| Complex 1                                                                                                                                                                 |            |                                        |            |                                        |            |                                          |            |
|---------------------------------------------------------------------------------------------------------------------------------------------------------------------------|------------|----------------------------------------|------------|----------------------------------------|------------|------------------------------------------|------------|
| Cu1-O1                                                                                                                                                                    | 1.935(2)   | Cu1-O1 <sup>1</sup>                    | 1.935(2)   | Cu1-O9W <sup>2</sup>                   | 2.078(3)   | Cu1-O9W <sup>3</sup>                     | 2.078(3)   |
| Cu1-O10W                                                                                                                                                                  | 2.212(4)   | Cu1-O10W <sup>1</sup>                  | 2.212(4)   | Cu2-O3                                 | 1.948(2)   | Cu2-O9W <sup>4</sup>                     | 1.957(3)   |
| Cu2-O7 <sup>5</sup>                                                                                                                                                       | 1.998(3)   | Cu2-N1                                 | 2.031(3)   | Cu2-O6 <sup>4</sup>                    | 2.301(3)   | Cu3-O9W                                  | 1.939(3)   |
| Cu3-O5                                                                                                                                                                    | 1.962(3)   | Cu3-N2 <sup>6</sup>                    | 1.967(3)   | Cu3-O4 <sup>4</sup>                    | 2.005(2)   | O1-Cu1-O1 <sup>1</sup>                   | 180.0(2)   |
| O1-Cu1-O9W <sup>2</sup>                                                                                                                                                   | 88.70(11)  | O1 <sup>1</sup> -Cu1-O9W <sup>2</sup>  | 91.30(11)  | O1-Cu1-O9W <sup>3</sup>                | 91.30(11)  | O1 <sup>1</sup> -Cu1-O9W <sup>3</sup>    | 88.70(11)  |
| O9W <sup>2</sup> -Cu1-O9W <sup>3</sup>                                                                                                                                    | 180.0      | O1-Cu1-O10W                            | 97.97(13)  | O1 <sup>1</sup> -Cu1-O10W              | 82.03(13)  | O9W <sup>2</sup> -Cu1-O10W               | 94.32(12)  |
| O9W <sup>3</sup> -Cu1-O10W                                                                                                                                                | 85.68(12)  | O1-Cu1-O10W <sup>1</sup>               | 82.03(13)  | O1 <sup>1</sup> -Cu1-O10W <sup>1</sup> | 97.97(13)  | O9W <sup>2</sup> -Cu1-O10W <sup>1</sup>  | 85.68(12)  |
| O9W <sup>3</sup> -Cu1-O10W <sup>1</sup>                                                                                                                                   | 94.32(12)  | O10W-Cu1-O10W <sup>1</sup>             | 180.0(2)   | O3-Cu2-O9W <sup>4</sup>                | 96.00(10)  | O3-Cu2-O7 <sup>5</sup>                   | 160.43(12) |
| O9W <sup>4</sup> -Cu2-O7 <sup>5</sup>                                                                                                                                     | 90.14(11)  | O3-Cu2-N1                              | 89.91(12)  | O9W <sup>4</sup> -Cu2-N1               | 173.93(11) | O7 <sup>5</sup> -Cu2-N1                  | 83.81(12)  |
| O3-Cu2-O6 <sup>4</sup>                                                                                                                                                    | 100.86(11) | O9W <sup>4</sup> -Cu2-O6 <sup>4</sup>  | 87.41(11)  | O7 <sup>5</sup> -Cu2-O6 <sup>4</sup>   | 97.96(11)  | N1-Cu2-O6 <sup>4</sup>                   | 92.85(12)  |
| O9W-Cu3-O5                                                                                                                                                                | 92.84(11)  | O9W-Cu3-N2 <sup>6</sup>                | 159.13(13) | O5-Cu3-N2 <sup>6</sup>                 | 91.48(12)  | O9W-Cu3-O4 <sup>4</sup>                  | 95.70(11)  |
| O5-Cu3-O4 <sup>4</sup>                                                                                                                                                    | 134.77(13) | N2 <sup>6</sup> -Cu3-O4 <sup>4</sup>   | 95.68(12)  |                                        |            |                                          |            |
| Symmetry codes: <sup>1</sup> -X,-Y,1-Z; <sup>2</sup> -1+X,-1+Y,+Z; <sup>3</sup> 1-X,1-Y,1-Z; <sup>4</sup> 2-X,1-Y,1-Z; <sup>5</sup> +X,-1+Y,-1+Z; <sup>6</sup> 1-X,-Y,-Z; |            |                                        |            |                                        |            |                                          |            |
| Complex 2                                                                                                                                                                 |            |                                        |            |                                        |            |                                          |            |
| Cu1-Cu1 <sup>#1</sup>                                                                                                                                                     | 2.6183(11) | Cu1-O7 <sup>#1</sup>                   | 1.964(3)   | Cu1-O3 <sup>#2</sup>                   | 1.963(3)   | Cu1-O8                                   | 1.961(3)   |
| Cu1-O4 <sup>#3</sup>                                                                                                                                                      | 1.959(3)   | Cu1-O9W                                | 2.176(3)   | Cu2-O2                                 | 1.900(3)   | Cu2-O5 <sup>#4</sup>                     | 1.957(3)   |
| Cu2-O12W                                                                                                                                                                  | 1.982(3)   | Cu2-O10W                               | 2.374(4)   | Cu2-O11W                               | 1.992(3)   | O7 <sup>1</sup> -Cu1-Cu1 <sup>1</sup>    | 89.77(9)   |
| O7 <sup>1</sup> -Cu1-O9W                                                                                                                                                  | 97.13(15)  | O3 <sup>2</sup> -Cu1-Cu1 <sup>1</sup>  | 87.55(9)   | O3 <sup>2</sup> -Cu1-O7 <sup>1</sup>   | 87.40(13)  | O3 <sup>2</sup> -Cu1-O9W                 | 97.16(13)  |
| O8-Cu1-Cu1 <sup>1</sup>                                                                                                                                                   | 78.89(9)   | O8-Cu1-O7 <sup>1</sup>                 | 168.31(12) | O8-Cu1-O3 <sup>2</sup>                 | 89.25(13)  | O8-Cu1-O9W                               | 94.40(15)  |
| O4 <sup>3</sup> -Cu1-Cu1 <sup>1</sup>                                                                                                                                     | 81.12(9)   | O4 <sup>3</sup> -Cu1-O7 <sup>1</sup>   | 89.40(15)  | O4 <sup>3</sup> -Cu1-O3 <sup>2</sup>   | 168.24(12) | O4 <sup>3</sup> -Cu1-O8                  | 91.64(15)  |
| O4 <sup>3</sup> -Cu1-O9W                                                                                                                                                  | 94.47(13)  | O9W-Cu1-Cu1 <sup>1</sup>               | 171.79(12) | O2-Cu2-O5 <sup>4</sup>                 | 176.20(13) | O2-Cu2-O12W                              | 87.24(13)  |
| O2-Cu2-O10W                                                                                                                                                               | 88.35(16)  | O2-Cu2-O11W                            | 90.96(14)  | O5 <sup>4</sup> -Cu2-O12W              | 89.16(13)  | O5 <sup>4</sup> -Cu2-O10W                | 92.91(17)  |
| O5 <sup>4</sup> -Cu2-O11W                                                                                                                                                 | 92.55(14)  | O12W-Cu2-O10W                          | 90.07(15)  | O12W-Cu2-O11W                          | 175.99(14) | O11W-Cu2-O10W                            | 93.46(15)  |
| Symmetry codes: <sup>1</sup> -X,1-Y,2-Z; <sup>2</sup> +X,+Y,1+Z; <sup>3</sup> -X,1-Y,1-Z; <sup>4</sup> -1+X,1/2-Y,-1/2+Z;                                                 |            |                                        |            |                                        |            |                                          |            |
| Complex 3                                                                                                                                                                 |            |                                        |            |                                        |            |                                          |            |
| Co1-O12W                                                                                                                                                                  | 2.114(4)   | Co1-O12W <sup>1</sup>                  | 2.114(4)   | Co1-O13W                               | 2.102(4)   | Co1-O13W <sup>1</sup>                    | 2.102(4)   |
| Co1-N1                                                                                                                                                                    | 2.147(4)   | Co1-N1 <sup>1</sup>                    | 2.147(4)   | Co2-O1                                 | 2.046(3)   | Co2-O5 <sup>2</sup>                      | 2.220(4)   |
| Co2-O6 <sup>2</sup>                                                                                                                                                       | 2.154(4)   | Co2-O9W                                | 2.186(5)   | Co2-O10W                               | 2.165(5)   | Co2-C15 <sup>2</sup>                     | 2.505(6)   |
| Co2-O11W                                                                                                                                                                  | 1.987(6)   | O12W-Co1-O12W <sup>1</sup>             | 180.00(16) | O12W-Co1-N1 <sup>1</sup>               | 91.10(16)  | O12W-Co1-N1                              | 88.90(16)  |
| O12W <sup>1</sup> -Co1-N1                                                                                                                                                 | 91.10(16)  | O12W <sup>1</sup> -Co1-N1 <sup>1</sup> | 88.90(16)  | O13W-Co1-O12W <sup>1</sup>             | 89.80(16)  | O13W <sup>1</sup> -Co1-O12W <sup>1</sup> | 90.20(16)  |
| O13W <sup>1</sup> -Co1-O12W                                                                                                                                               | 89.80(16)  | O13W-Co1-O12W                          | 90.20(16)  | O13W <sup>1</sup> -Co1-O13W            | 180.000(1) | O13W-Co1-N1                              | 87.99(17)  |
| O13W <sup>1</sup> -Co1-N1 <sup>1</sup>                                                                                                                                    | 87.99(17)  | O13W <sup>1</sup> -Co1-N1              | 92.01(17)  | O13W-Co1-N1 <sup>1</sup>               | 92.01(17)  | N1-Co1-N1 <sup>1</sup>                   | 180.000(1) |
| O1-Co2-O5 <sup>2</sup>                                                                                                                                                    | 153.91(16) | O1-Co2-O6 <sup>2</sup>                 | 94.18(15)  | O1-Co2-O9W                             | 92.81(16)  | O1-Co2-O10W                              | 92.81(17)  |
| O1-Co2-C15 <sup>2</sup>                                                                                                                                                   | 123.72(17) | O5 <sup>2</sup> -Co2-C15 <sup>2</sup>  | 30.33(17)  | O6 <sup>2</sup> -Co2-O5 <sup>2</sup>   | 59.73(15)  | O6 <sup>2</sup> -Co2-O9W                 | 90.00(19)  |
| O6 <sup>2</sup> -Co2-O10W                                                                                                                                                 | 98.1(2)    | O6 <sup>2</sup> -Co2-C15 <sup>2</sup>  | 29.75(16)  | O9W-Co2-O5 <sup>2</sup>                | 87.95(17)  | O9W-Co2-C15 <sup>2</sup>                 | 85.44(19)  |
| O10W-Co2-O5 <sup>2</sup>                                                                                                                                                  | 90.77(18)  | O10W-Co2-O9W                           | 169.7(2)   | O10W-Co2-C15 <sup>2</sup>              | 98.5(2)    | O11W-Co2-O1                              | 106.6(2)   |
| O11W-Co2-O5 <sup>2</sup>                                                                                                                                                  | 99.4(2)    | O11W-Co2-O6 <sup>2</sup>               | 158.8(2)   | O11W-Co2-O9W                           | 85.3(2)    | O11W-Co2-O10W                            | 84.9(3)    |
| O11W-Co2-C15 <sup>2</sup>                                                                                                                                                 | 129.1(2)   |                                        |            |                                        |            |                                          |            |
| Symmetry codes: <sup>1</sup> 2-X,1-Y,1-Z; <sup>2</sup> +X,-1+Y,+Z;                                                                                                        |            |                                        |            |                                        |            |                                          |            |
| Complex 4                                                                                                                                                                 |            |                                        |            |                                        |            |                                          |            |
| Ni1-O2                                                                                                                                                                    | 2.019(3)   | Ni1-O3 <sup>1</sup>                    | 2.044(3)   | Ni1-O12W                               | 2.113(3)   | Ni1-O13W                                 | 2.104(3)   |
| Ni1-N3                                                                                                                                                                    | 2.087(4)   | Ni1-N6 <sup>2</sup>                    | 2.068(4)   | Ni2-O6 <sup>3</sup>                    | 2.059(3)   | Ni2-O7                                   | 2.076(3)   |
| Ni2-O9W                                                                                                                                                                   | 2.087(3)   | Ni2-O10W                               | 2.091(3)   | Ni2-O11W                               | 2.144(3)   | Ni2-N1                                   | 2.055(4)   |
| O2-Ni1-O3 <sup>1</sup>                                                                                                                                                    | 178.91(13) | O2-Ni1-O12W                            | 91.08(11)  | O2-Ni1-O13W                            | 88.76(12)  | O2-Ni1-N3                                | 90.16(13)  |
| O2-Ni1-N6 <sup>2</sup>                                                                                                                                                    | 89.97(13)  | O3 <sup>1</sup> -Ni1-O12W              | 89.47(11)  | O3 <sup>1</sup> -Ni1-O13W              | 90.71(12)  | O3 <sup>1</sup> -Ni1-N3                  | 90.82(13)  |
| O3 <sup>1</sup> -Ni1-N6 <sup>2</sup>                                                                                                                                      | 89.06(13)  | O13W-Ni1-O12W                          | 179.13(12) | N3-Ni1-O12W                            | 85.50(13)  | N3-Ni1-O13W                              | 93.65(13)  |

## Electronic Supplementary Information (ESI) for RSC Advances

Table S1 Selected bond lengths (Å) and angles (°) for 1-4.

|                           |            |                           |            |                           |            |                         |            |
|---------------------------|------------|---------------------------|------------|---------------------------|------------|-------------------------|------------|
| N6 <sup>2</sup> -Ni1-O12W | 93.03(13)  | N6 <sup>2</sup> -Ni1-O13W | 87.82(13)  | N6 <sup>2</sup> -Ni1-N3   | 178.53(14) | O6 <sup>3</sup> -Ni2-O7 | 85.10(12)  |
| O6 <sup>3</sup> -Ni2-O9W  | 92.31(13)  | O6 <sup>3</sup> -Ni2-O10W | 91.42(12)  | O6 <sup>3</sup> -Ni2-O11W | 89.07(13)  | O7-Ni2-O9W              | 93.50(12)  |
| O7-Ni2-O10W               | 175.87(12) | O7-Ni2-O11W               | 90.40(13)  | O9W-Ni2-O10W              | 88.86(13)  | O9W-Ni2-O11W            | 175.96(13) |
| O10W-Ni2-O11W             | 87.31(13)  | N1-Ni2-O6 <sup>3</sup>    | 175.36(14) | N1-Ni2-O7                 | 90.68(14)  | N1-Ni2-O9W              | 89.89(14)  |
| N1-Ni2-O10W               | 92.71(14)  | N1-Ni2-O11W               | 89.01(14)  |                           |            |                         |            |

Symmetry codes: <sup>1</sup>1/2-X,1/2+Y,1/2-Z; <sup>2</sup>1/2+X,3/2-Y,1/2+Z; <sup>3</sup>-X,1-Y,1-Z;

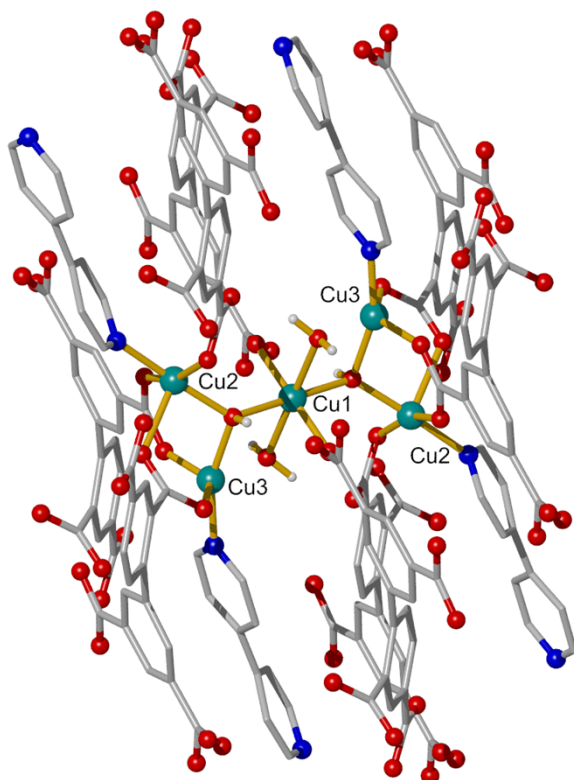

Fig.S1 The metal coordination environment of complex 1

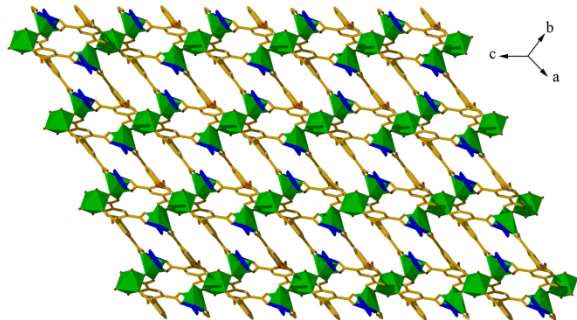

Fig. S2 View of the 3D framework of compound 1 along the [111] direction with one-dimensional channels and hydrogen atoms omitted for clarity.

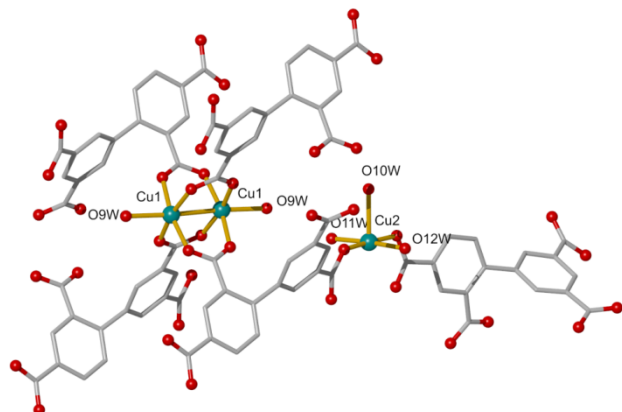

Fig.S3 The metal coordination environment of complex 2

Table S2. The hydrogen bond geometry for complex 2

| Complex 2          |       |         |         |              |
|--------------------|-------|---------|---------|--------------|
| D-H ... A          | D - H | H ... A | D ... A | ∠D - H ... A |
| O12W - H12B ... O1 | 0.85  | 1.91    | 2.6735  | 148          |
| O12W - H12A ... O6 | 0.85  | 1.98    | 2.7164  | 143          |

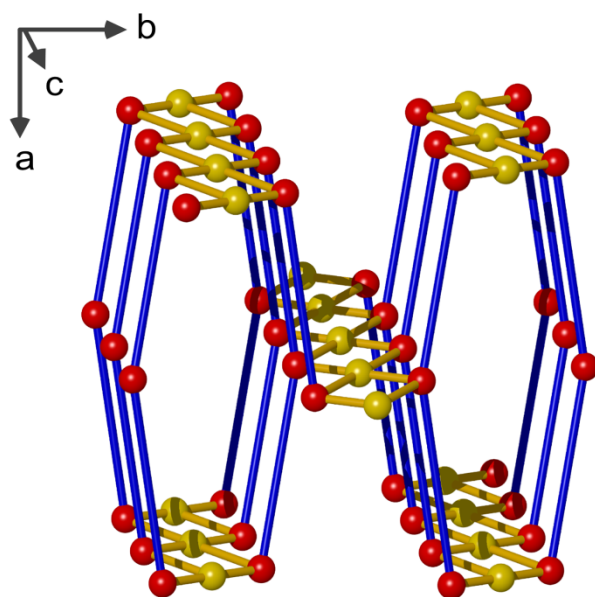Fig.S4 Schematic view of one of the two interpenetrated nets for complex 2 (red nodes: bptc<sup>+</sup> ligands; golden nodes:

binuclear Cu1 clusters; blue rods: mononuclear Cu2 ions)

Table S3. The hydrogen bond geometry for complex 3

| D-H ... A                          | D - H | H ... A | D ... A | ∠D - H ... A |
|------------------------------------|-------|---------|---------|--------------|
| O9W - H9WA ... O7 <sup>a</sup>     | 0.87  | 1.89    | 2.7508  | 168          |
| O10W - H10WA ... O15W <sup>b</sup> | 0.89  | 2.16    | 2.9082  | 141          |
| O11W - H11WA ... O15W <sup>c</sup> | 0.85  | 1.87    | 2.6595  | 152          |
| O8 - H8 ... O4 <sup>d</sup>        | 0.82  | 1.79    | 2.6050  | 175          |

Symmetry codes: a)  $1-x, 1-y, -z$ ; b)  $x, 1+y, z$ ; c)  $2-x, 1-y, 1-z$ ; d)  $-x, -y, -z$

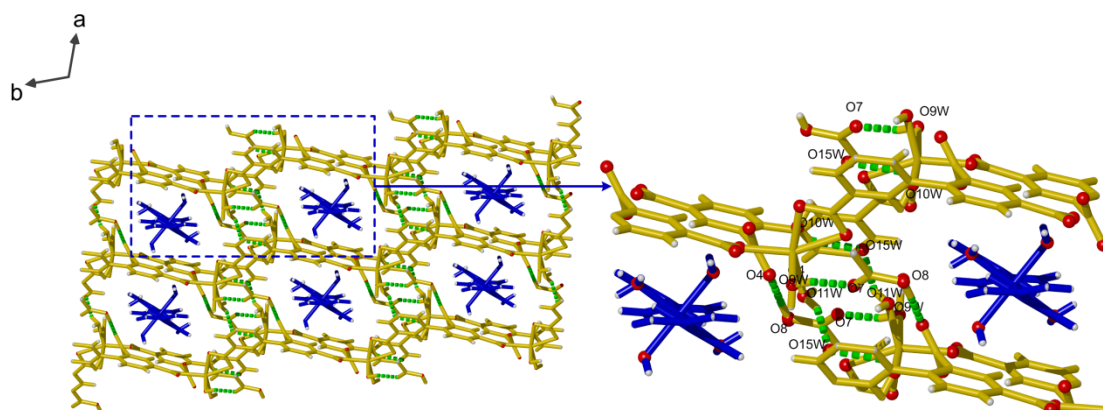

Fig. S5 The 3D supermolecular structure of complex 3 (green dashed bond: hydrogen bond; blue part: 1D cation chains).

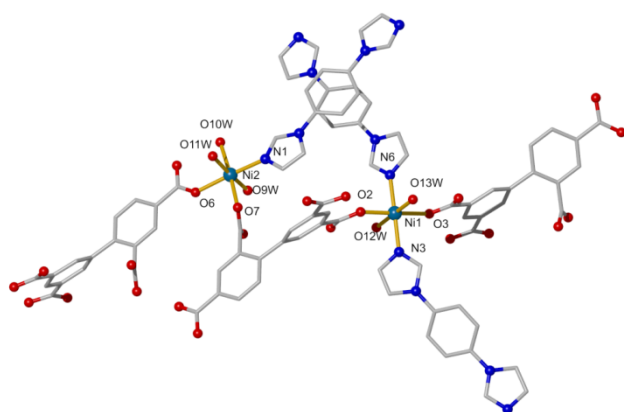

Fig.S6 The metal coordination environment of complex 4

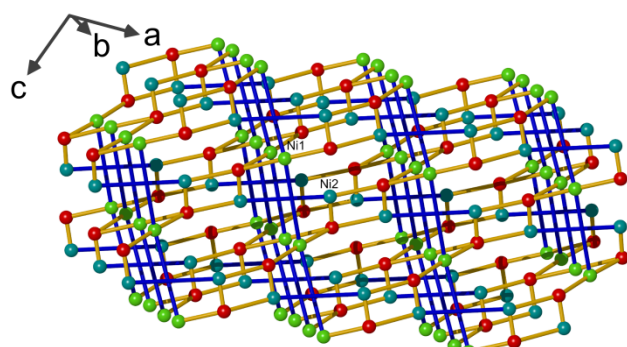

Fig.S7 Schematic view of one of the two interpenetrated nets for complex 4 (red nodes: bpte<sup>4+</sup> ligands; green nodes: Ni1 ions; teal nodes: Ni2 ions; blue rods: 1,4-bis ligands)

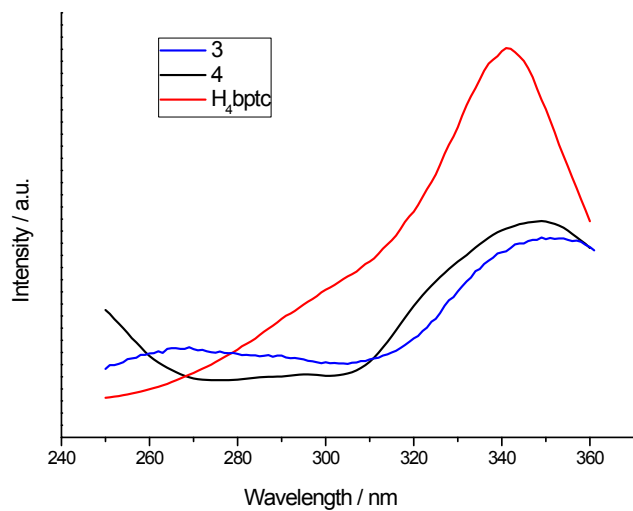

Fig. S8 The excitation spectra of complexes 3, 4 and the H<sub>4</sub>bptc ligand.
